# Supplementary material
Source: publisher site journal article supplement (https://www.spandidos-publications.com/1320/downloadSupplementary)
Supplement: Supplementary file 1 [file downloadSupplementary]

Table SVI. *In silico* analysis of variants detected in the present study.

| Location           | Gene             | Amino acids<br>change | PolyPhen-2           | Mutation<br>Taster | REVEL<br>(>0.5) | M-CAP                  | MaxEntSca<br>n | BDGP | NetGene<br>2 |
|--------------------|------------------|-----------------------|----------------------|--------------------|-----------------|------------------------|----------------|------|--------------|
| chr14:8155<br>8933 | <i>TSHR</i>      | p.C176R               | PROBABLY<br>DAMAGING | Disease<br>causing | 0.718           | Possibly<br>Pathogenic |                |      |              |
| chr14:8160<br>9751 | <i>TSHR</i>      | p.R450H               | PROBABLY<br>DAMAGING | Disease<br>causing | 0.943           | Possibly<br>Pathogenic |                |      |              |
| chr14:8160<br>9984 | <i>TSHR</i>      | p.R528S               | BENIGN               | Disease<br>causing | 0.303           | Possibly<br>Pathogenic |                |      |              |
| chr14:8161<br>0254 | <i>TSHR</i>      | p.K618*               |                      | Disease<br>causing |                 |                        |                |      |              |
| chr15:4540<br>4068 | <i>DUOX</i><br>2 | p.D137E               | PROBABLY<br>DAMAGING | Disease<br>causing | 0.53            | Possibly<br>Pathogenic |                |      |              |
| chr15:4540<br>2093 | <i>DUOX</i><br>2 | p.R376W               | PROBABLY<br>DAMAGING | Disease<br>causing | 0.421           | Possibly<br>Pathogenic |                |      |              |
| chr15:4540<br>1791 | <i>DUOX</i><br>2 | p.E389K               | BENIGN               | Polymorphi<br>sm   | 0.111           | Likely Benign          |                |      |              |
| chr15:4540<br>1737 | <i>DUOX</i><br>2 | p.V407F               | PROBABLY<br>DAMAGING | Disease<br>causing | 0.37            | Possibly<br>Pathogenic |                |      |              |
| chr15:4538         | <i>DUOX</i>      | p.G1521*              |                      | Disease            |                 |                        |                |      |              |

|            |             |               |          |         |       |            |
|------------|-------------|---------------|----------|---------|-------|------------|
| 6434       | 2           |               |          | causing |       |            |
| chr15:4540 | <i>DUOX</i> | p.R432H       | PROBABLY | Disease | 0.296 | Possibly   |
| 1090       | 2           |               | DAMAGING | causing |       | Pathogenic |
| chr15:4540 | <i>DUOX</i> | p.R434*       |          | Disease |       |            |
| 1085       | 2           |               |          | causing |       |            |
| chr15:4540 | <i>DUOX</i> | p.R434_S440de |          | Disease |       |            |
| 1064       | 2           | 1             |          | causing |       |            |
| chr15:4539 | <i>DUOX</i> | p.K530*       |          | Disease |       |            |
| 9648       | 2           |               |          | causing |       |            |
| chr15:4539 | <i>DUOX</i> | p.F591S       | PROBABLY | Disease | 0.691 | Possibly   |
| 9089       | 2           |               | DAMAGING | causing |       | Pathogenic |
| chr15:4539 | <i>DUOX</i> | p.G624fs      |          | Disease |       |            |
| 8800       | 2           |               |          | causing |       |            |
| chr15:4539 | <i>DUOX</i> | p.R625*       |          | Disease |       |            |
| 8798       | 2           |               |          | causing |       |            |
| chr15:4539 | <i>DUOX</i> | p.V779M       |          | Disease | 0.079 |            |
| 6563       | 2           |               | BENIGN   | causing |       |            |
| chr15:4539 | <i>DUOX</i> | p.T803fs      |          | Disease |       |            |
| 6491       | 2           |               |          | causing |       |            |
| chr15:4539 | <i>DUOX</i> | p.E879K       | PROBABLY | Disease | 0.793 | Possibly   |
| 6177       | 2           |               | DAMAGING | causing |       | Pathogenic |
| chr15:4539 | <i>DUOX</i> | p.R885L       | PROBABLY | Disease | 0.22  | Possibly   |

|            |              |            |          |            |       |            |           |        |        |
|------------|--------------|------------|----------|------------|-------|------------|-----------|--------|--------|
| 6158       | 2            |            | DAMAGING | causing    |       | Pathogenic |           |        |        |
| chr15:4539 | <i>DUOX</i>  | p.R1110Q   | PROBABLY | Disease    | 0.91  | Possibly   |           |        |        |
| 1946       | 2            |            | DAMAGING | causing    |       | Pathogenic |           |        |        |
| chr15:4538 | <i>DUOX</i>  | p.A1206T   | PROBABLY | Disease    | 0.381 | Possibly   |           |        |        |
| 9889       | 2            |            | DAMAGING | causing    |       | Pathogenic |           |        |        |
| chr15:4538 | <i>DUOX</i>  | IVS28+1G>T |          |            |       |            |           |        |        |
| 9811       | 2            |            |          |            |       |            | 8.72/0.22 | 0.91/- | 0.82/- |
| chr15:4538 | <i>DUOX</i>  | p.Y1415C   | PROBABLY | Disease    | 0.913 | Possibly   |           |        |        |
| 7285       | 2            |            | DAMAGING | causing    |       | Pathogenic |           |        |        |
| chr15:4540 | <i>DUOX</i>  | p.R94C     | PROBABLY | Polymorphi | 0.222 | Possibly   |           |        |        |
| 8396       | <i>A2</i>    |            | DAMAGING | sm         |       | Pathogenic |           |        |        |
| chr15:4540 | <i>DUOX</i>  | p.Y246*    |          | Disease    |       |            |           |        |        |
| 9472       | <i>A2</i>    |            |          | causing    |       |            |           |        |        |
| chr19:1800 | <i>SLC5A</i> | p.Q639*    |          | Polymorphi |       |            |           |        |        |
| 4669       | 5            |            |          | sm         |       |            |           |        |        |
| chr2:14809 | <i>TPO</i>   | p.S309P    |          | Polymorphi | 0.351 | Possibly   |           |        |        |
| 63         |              |            | BENIGN   | sm         |       | Pathogenic |           |        |        |
| chr2:14811 | <i>TPO</i>   | p.R361L    | PROBABLY | Disease    | 0.311 |            |           |        |        |
| 20         |              |            | DAMAGING | causing    |       |            |           |        |        |
| chr2:14917 | <i>TPO</i>   | p.S571R    |          | Polymorphi | 0.146 | Possibly   |           |        |        |
| 08         |              |            | BENIGN   | sm         |       | Pathogenic |           |        |        |
| chr2:15004 | <i>TPO</i>   | p.E757fs   |          | Disease    |       |            |           |        |        |

|                |                           |          |                      |                    |       |                        |
|----------------|---------------------------|----------|----------------------|--------------------|-------|------------------------|
| 18             |                           |          |                      | causing            |       |                        |
| chr2:1520672   | <i>TPO</i>                | p.R846W  | PROBABLY<br>DAMAGING | Polymorphi<br>sm   | 0.215 | Possibly<br>Pathogenic |
| chr2:1544394   | <i>TPO</i>                | p.P883S  | BENIGN               | Polymorphi<br>sm   | 0.317 | Likely Benign          |
| chr5:177421297 | <i>PROPI</i>              | p.G51V   | BENIGN               | Polymorphi<br>sm   | 0.166 | Possibly<br>Pathogenic |
| chr7:107303808 | <i>SLC26</i><br><i>A4</i> | p.Y78H   | PROBABLY<br>DAMAGING | Disease<br>causing | 0.96  | Possibly<br>Pathogenic |
| chr7:107334884 | <i>SLC26</i><br><i>A4</i> | p.A434T  | BENIGN               | Disease<br>causing | 0.602 | Possibly<br>Pathogenic |
| chr7:107341570 | <i>SLC26</i><br><i>A4</i> | p.Y578H  | PROBABLY<br>DAMAGING | Disease<br>causing | 0.507 | Possibly<br>Pathogenic |
| chr8:110100245 | <i>TRHR</i>               | p.I168M  | BENIGN               | Polymorphi<br>sm   | 0.068 | Likely Benign          |
| chr8:133885463 | <i>TG</i>                 | p.N212S  | BENIGN               | Polymorphi<br>sm   | 0.065 | Possibly<br>Pathogenic |
| chr8:133900739 | <i>TG</i>                 | p.R896Q  | PROBABLY<br>DAMAGING | Disease<br>causing | 0.325 | Possibly<br>Pathogenic |
| chr8:133906036 | <i>TG</i>                 | p.E955fs |                      | Disease<br>causing |       |                        |
| chr8:13395     | <i>TG</i>                 | p.V1738I | BENIGN               | Polymorphi         | 0.078 | Likely Benign          |

|                |    |           |                   |                 |       |                     |
|----------------|----|-----------|-------------------|-----------------|-------|---------------------|
| 3766           |    |           |                   | sm              |       |                     |
| chr8:133980087 | TG | p.S1912N  | BENIGN            | Polymorphisms   | 0.071 | Likely Benign       |
| chr8:133980143 | TG | p.I1931V  | BENIGN            | Polymorphisms   | 0.361 | Likely Benign       |
| chr8:134031903 | TG | p.L2282fs |                   | Disease causing |       |                     |
| chr8:134042211 | TG | p.I2394M  | PROBABLY DAMAGING | Disease causing | 0.397 | Possibly Pathogenic |
| chr8:134125846 | TG | p.R2585W  | PROBABLY DAMAGING | Disease causing | 0.117 | Possibly Pathogenic |

---

PolyPhen-2, MutationTaster, REVEL and M-CAP were used to predict the effects of missense and indel mutations; MaxEntScan, BDGP, and NetGene-2 were used to predict the damaging effects of splicing mutations with a wild-type/mutant score; – means depletion of the 5' splice site. PolyPhen-2, Polymorphism Phenotyping v2; REVEL, Rare Exome Variant Ensemble Learner; M-CAP, Mendelian Clinically Applicable Pathogenicity; BDGP, Berkeley Drosophila Genome Project; NA: not available.
